# Supplementary material for: Methane-to-methanol conversion over zeolite Cu-SSZ-13, and its comparison with the selective catalytic reduction of NOxwith NH3
Source: Royal Society of Chemistry journal article supplement (doi:10.1039/c7cy02461d), 2018-01-01
Supplement: c7cy02461d1.pdf [file c7cy02461d1.pdf]

# SUPPORTING INFORMATION

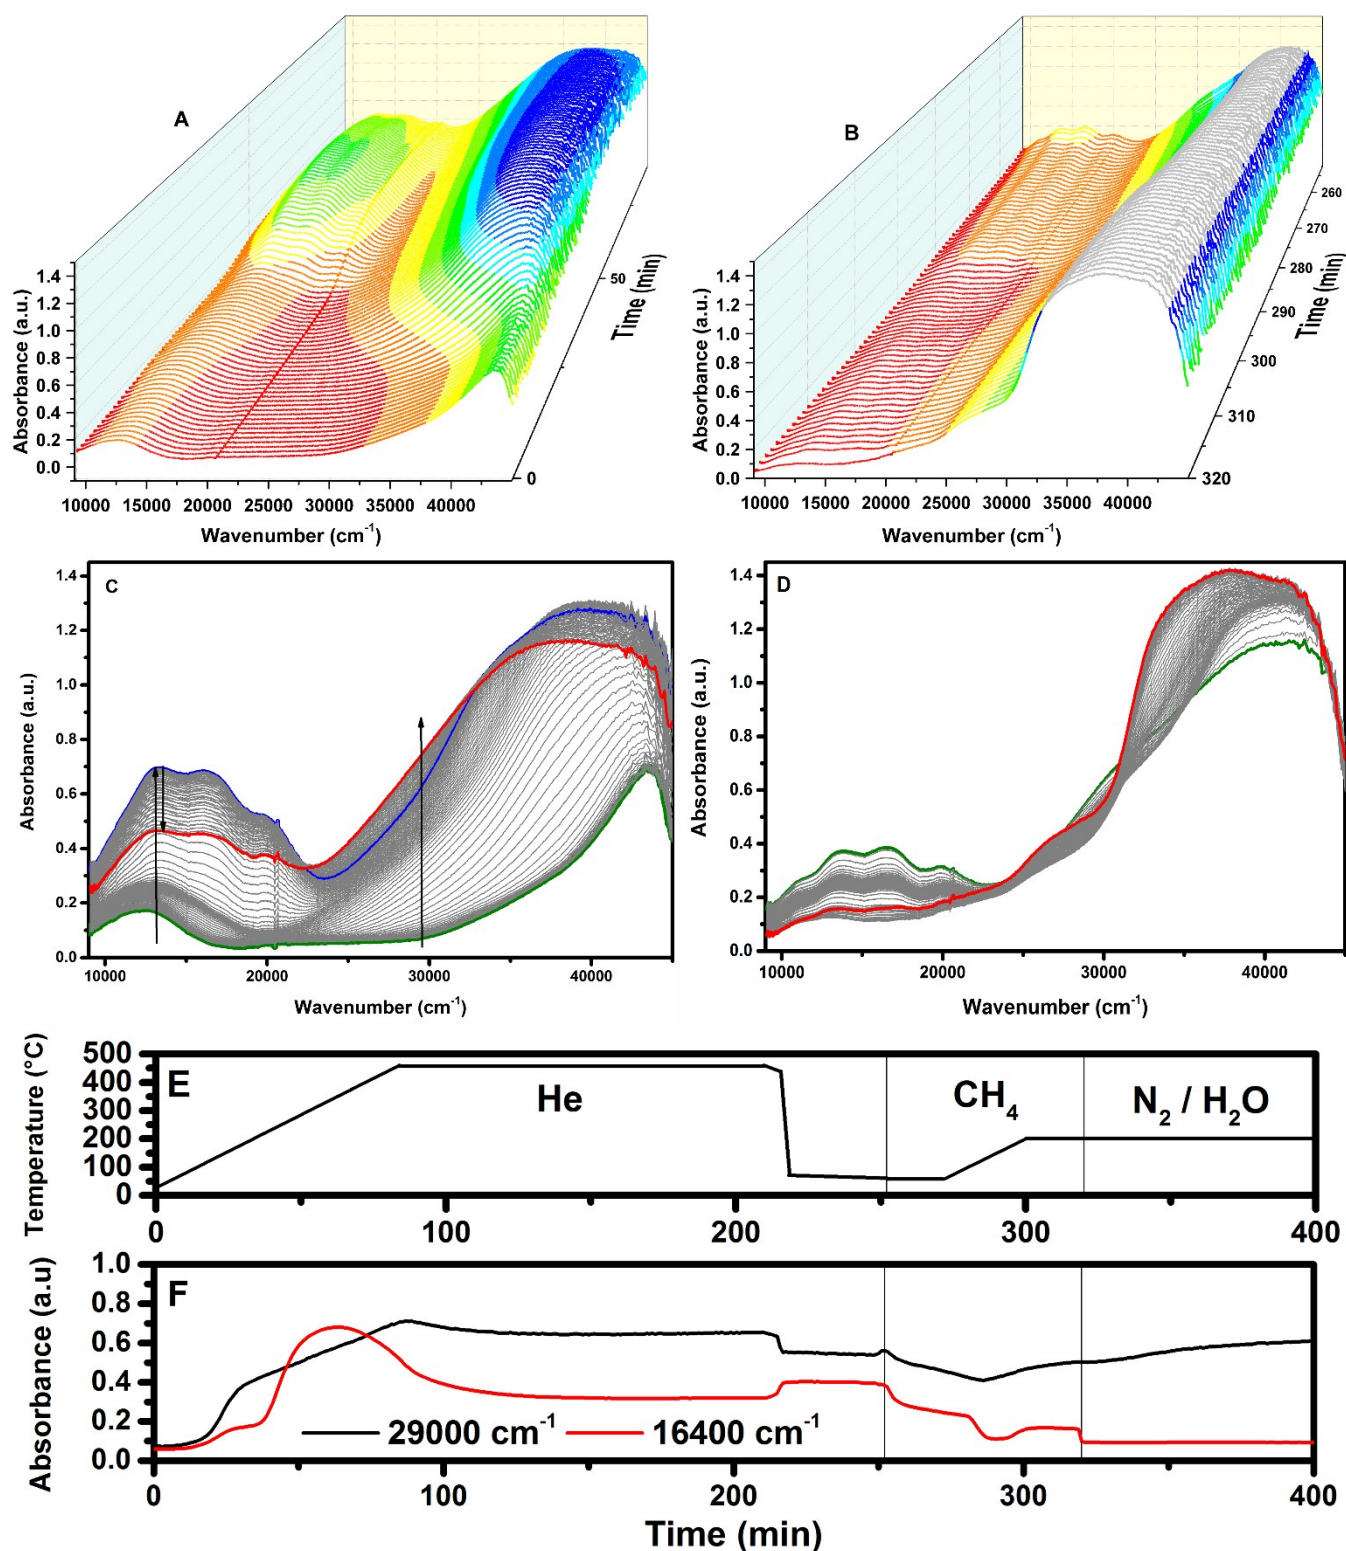

**Figure S1.** Operando UV-vis spectra of Cu-1.21-Na catalysts, a measurement was taken every minute, the arrow represents the time evolution A) and C) during He activation from RT to 450  $^{\circ}\text{C}$  (1 scan during every 5  $^{\circ}\text{C}$ ) B) and D) during  $\text{CH}_4$  addition from 60 to 200  $^{\circ}\text{C}$  (68 min or 68 scans are shown), arrows indicate the time evolution, the green spectrum is the starting point of the experiment, while the red spectrum is the endpoint. E) shows the temperature versus time for the operando experiment, while F) shows the development of the d-d band (16400  $\text{cm}^{-1}$ ) as well as the development of the 29000  $\text{cm}^{-1}$  band versus time.

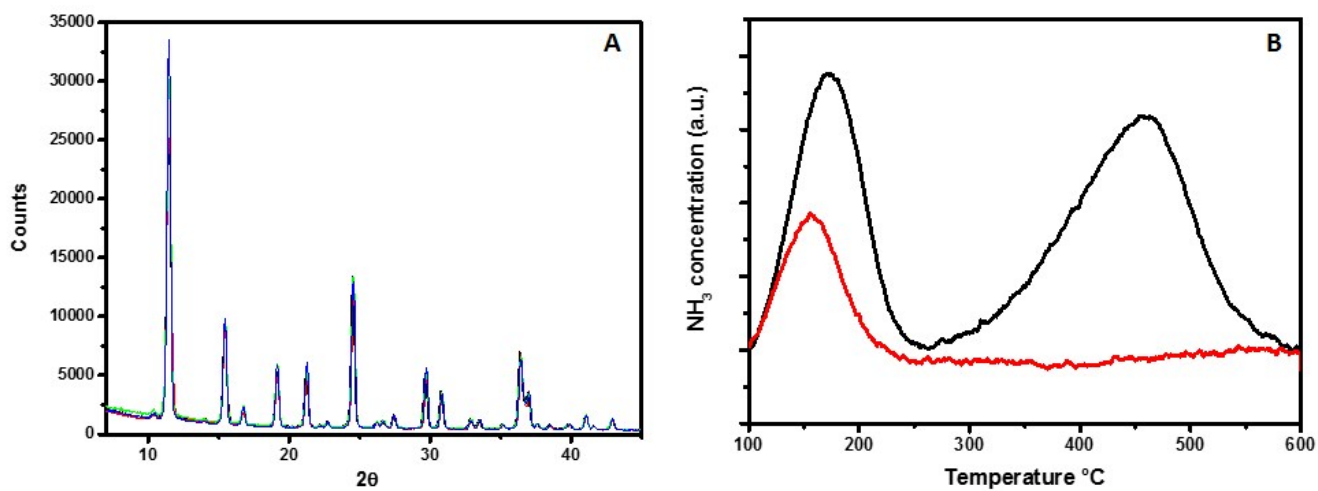

**Figure S2.** A) XRD patterns of the starting H-SSZ-13 material (black), Na-SSZ-13 (red), Cu-1.14-H (green) and Cu-0.91-Na (blue). Note Co k-alpha radiation (1.7XX Å) was used. B) NH<sub>3</sub>-TPD plots of H-SSZ-13 zeolite (black) and Na-SSZ-13 zeolite (red) before performing the Cu ion exchange.

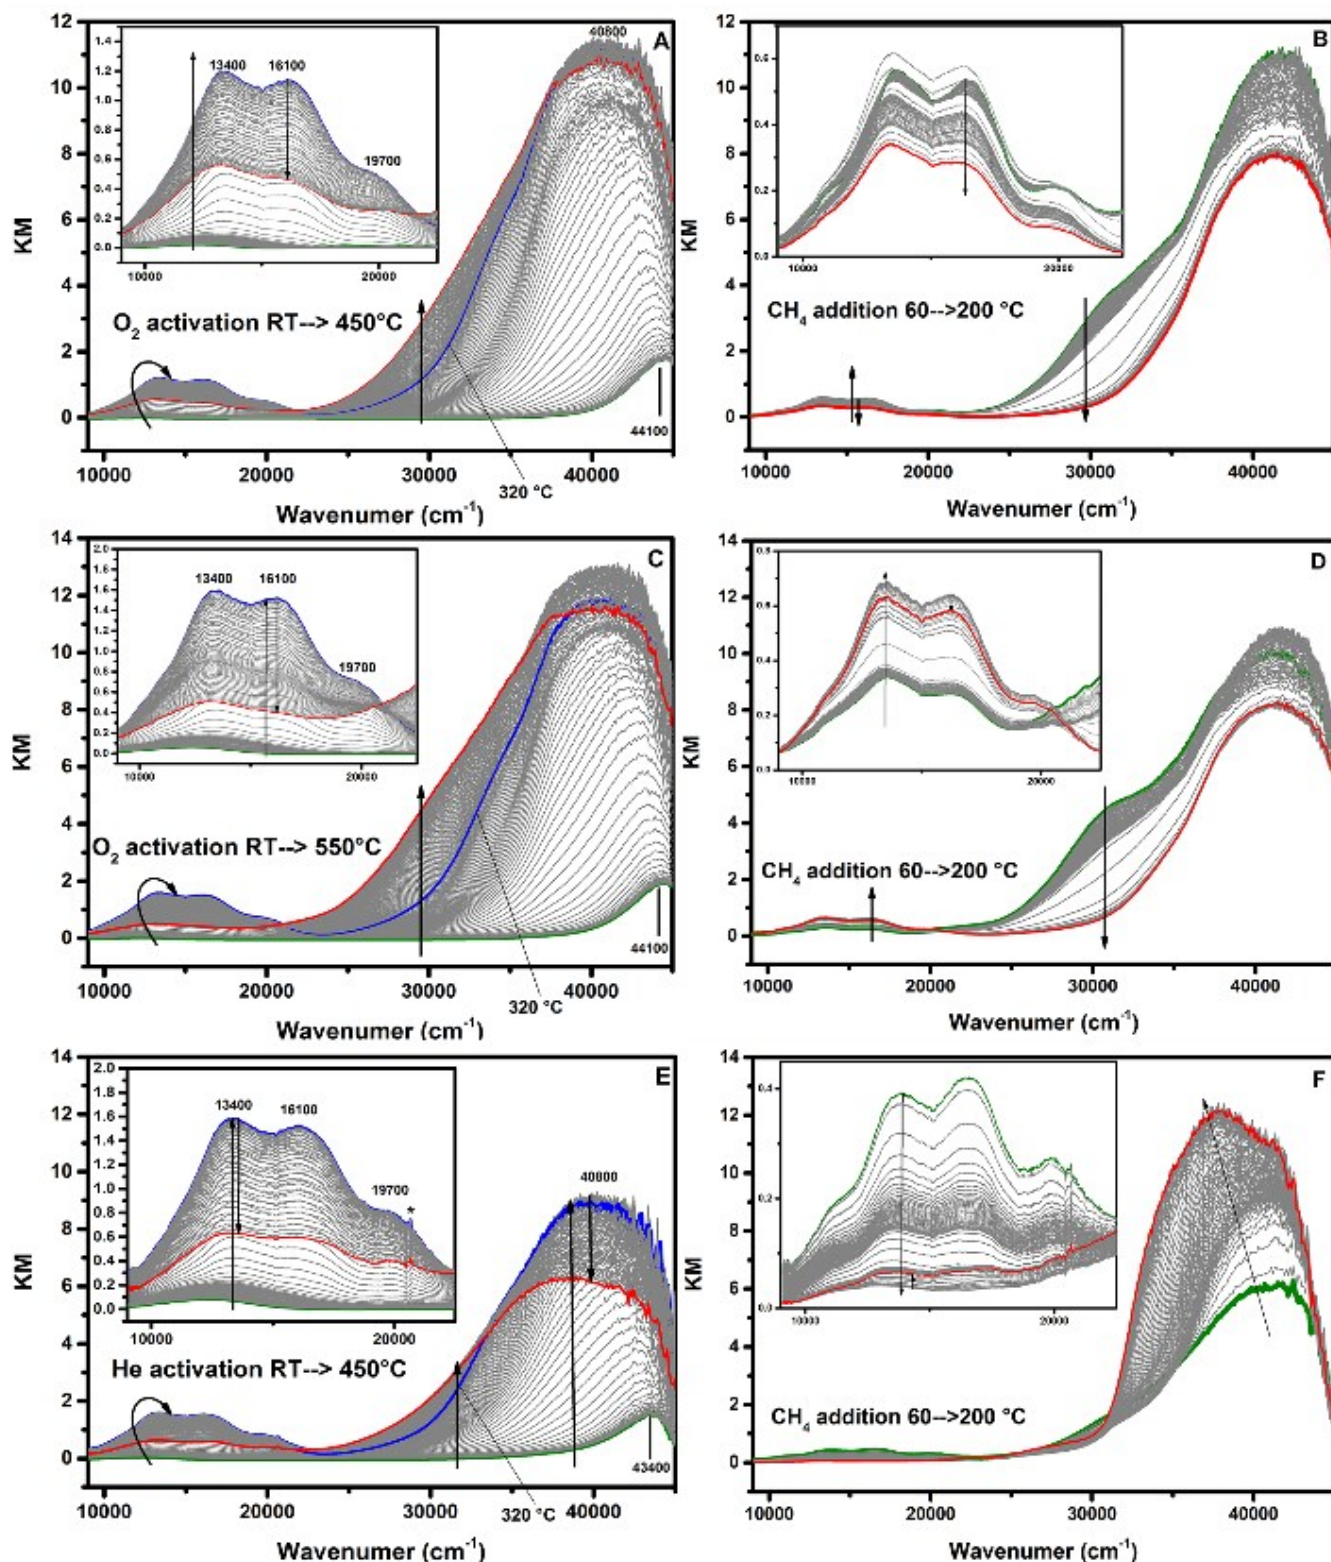

**Figure S3.** Operando UV-vis spectra of Cu-1.21-Na catalysts, a measurement was taken every minute, the arrow represents the time evolution A) during O<sub>2</sub> activation from RT to 450°C (1 scan during every 5 °C), the inset shows a zoom in on the Cu d-d region B) during CH<sub>4</sub> addition from at 60 to 200 °C (68 min or 68 scans are shown), arrows indicate the time evolution, the inset shows a zoom in on the Cu d-d region. C) and D), same catalyst and conditions but for 550 °C oxidation temperature. E) and F), same conditions and catalyst as A and B, but using He instead of O<sub>2</sub>. \* represents an artifact in the measurement.



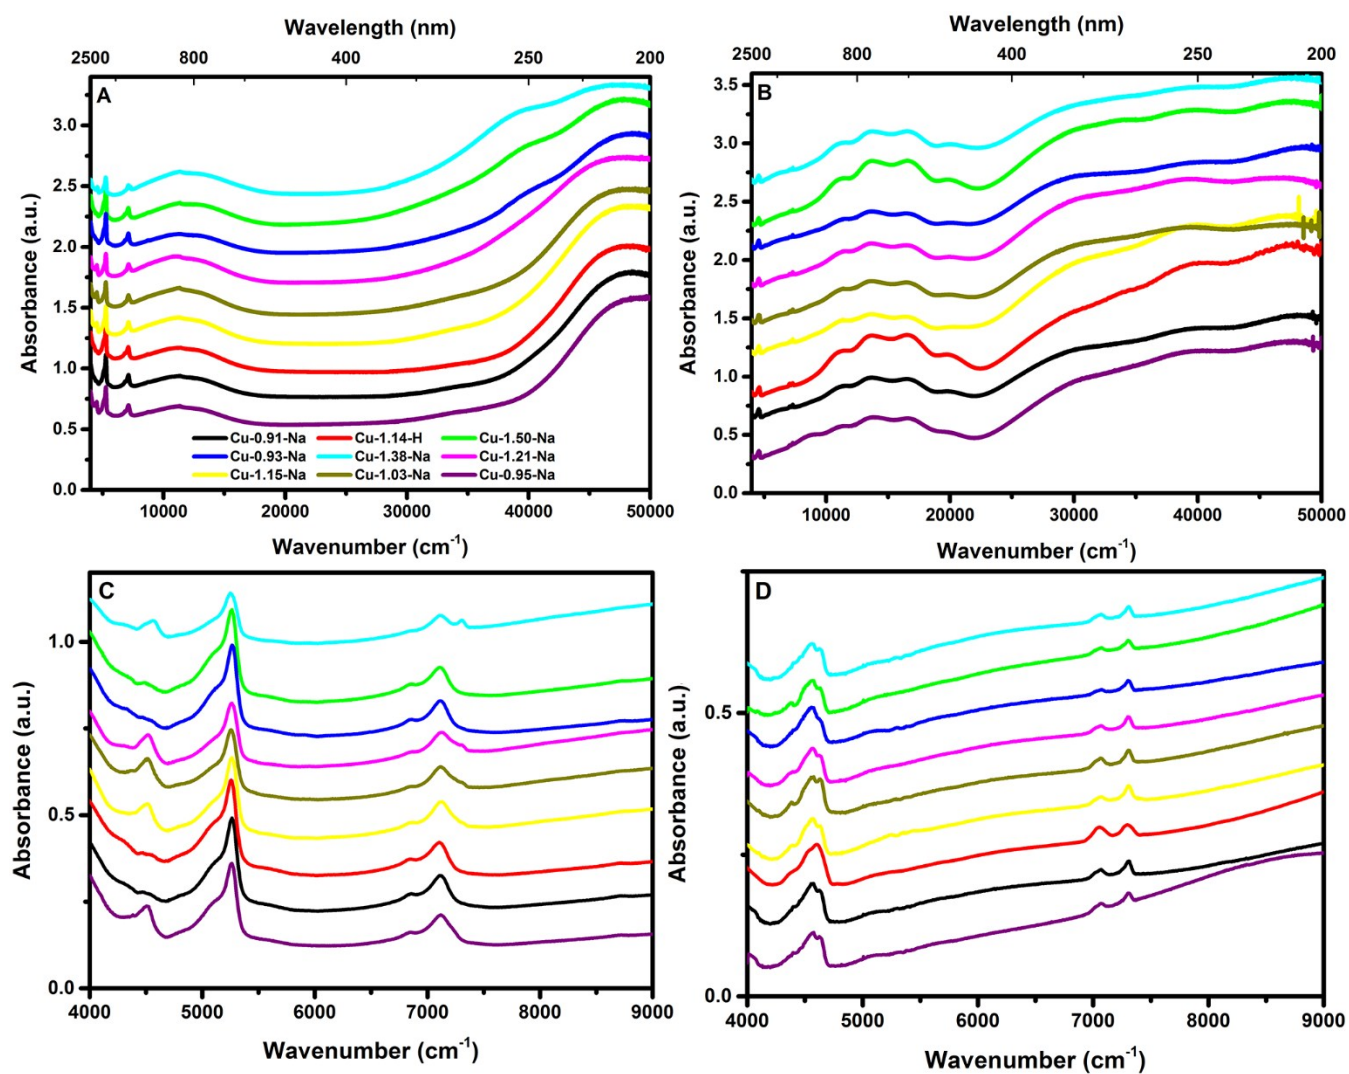

**Figure S4.** A) UV-vis-NIR DRS spectra of Cu-SSZ-13 in hydrated form. B) UV-vis-NIR DRS spectra of Cu-SSZ-13 after dehydration using dry O<sub>2</sub> at 450 °C for 2h. C) and D) NIR zoom in of the UV-vis-NIR DRS spectra of the Cu-SSZ-13 catalysts, C) hydrated spectra, D) dehydrated spectra.

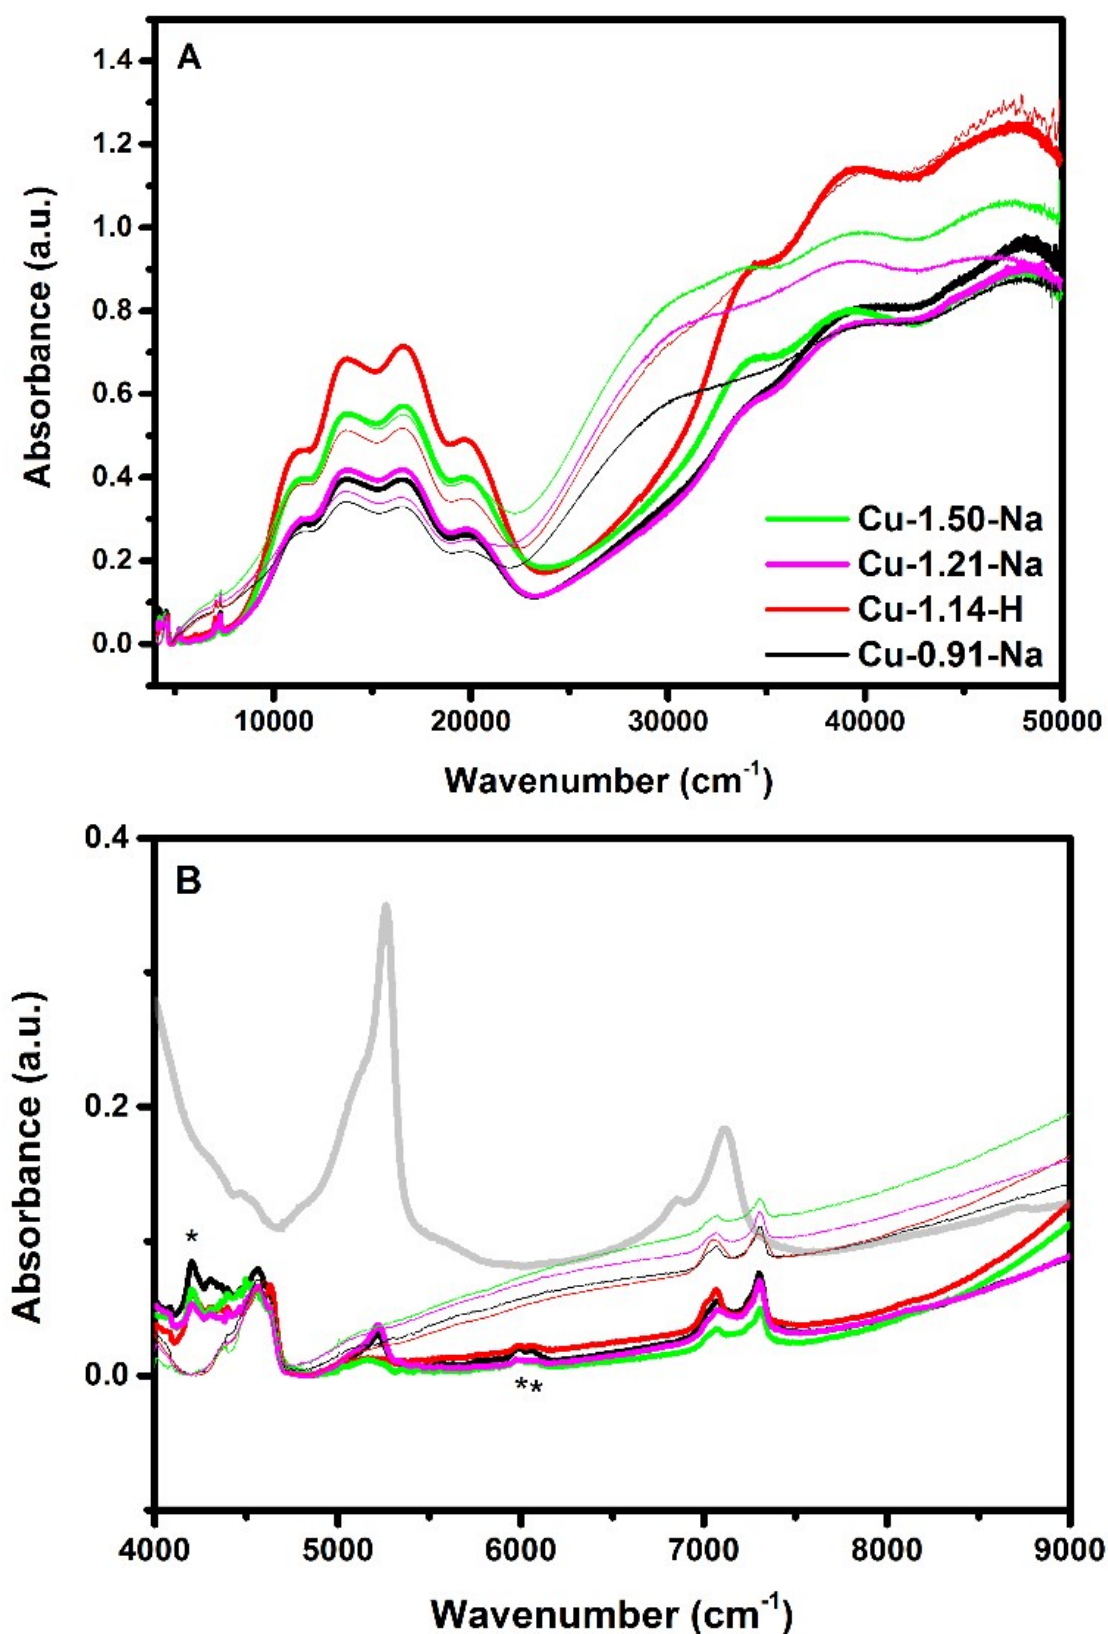

**Figure S5.** A) **Bold** lines UV-vis-NIR DRS spectra of Cu-SSZ-13 after dehydration using dry  $\text{O}_2$  at 450  $^{\circ}\text{C}$  for 2h, thin lines after further addition of  $\text{CH}_4$  at 200  $^{\circ}\text{C}$  for 1h. B) Near Infrared (NIR) region of the spectra after  $\text{CH}_4$  addition at 200  $^{\circ}\text{C}$  for 1 h. Thin lines; before  $\text{CH}_4$  addition, but after  $\text{O}_2$  activation; **Bold** after  $\text{CH}_4$  addition. Bands designated \* are due to the  $\text{CH}_3$  symmetrical and anti-symmetrical overtone vibrations, showing that at this point in the reaction,  $\text{CH}_3$  is present in the Cu- catalysts. As a reference one spectrum was added before  $\text{CH}_4$  addition (Grey). See Table 3 for the assignments of all NIR bands.

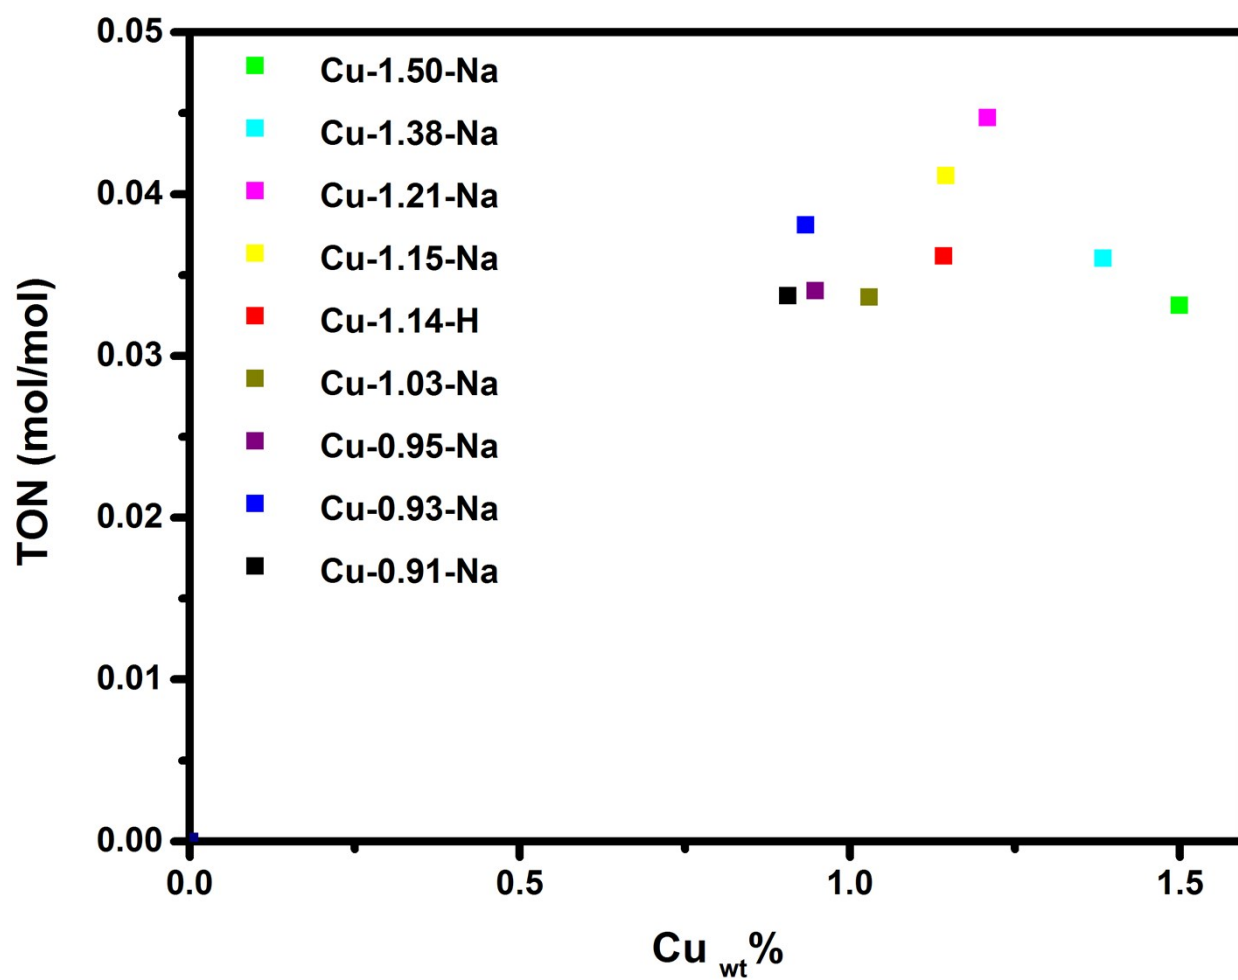

**Figure S6.** TON for the methane-to-methanol activation in mol methanol per mol copper for the Cu-exchanged zeolites using an oxidation temperature of 450 °C.
